1 **Active trachoma cases in the Solomon Islands have varied polymicrobial**  
2 **community structures but do not associate with individual non-**  
3 **chlamydial pathogens of the eye.**

4 Robert M R Butcher<sup>1\*</sup>, Oliver Sokana<sup>2</sup>, Kelvin Jack<sup>2</sup>, Eric Kalae<sup>4</sup>, Leslie Sui<sup>4</sup>, Charles Russell<sup>5</sup>,  
5 Joanna Houghton<sup>1</sup>, Christine Palmer<sup>1</sup>, Martin J Holland<sup>1</sup>, Richard T Le Mesurier<sup>6</sup>, Anthony W  
6 Solomon<sup>1,3</sup>, David C W Mabey<sup>1,3</sup>, Chrissy h. Roberts<sup>1</sup>.

7  
8 Author contact details:

9  
10 <sup>1</sup> Clinical Research Department, London School of Hygiene & Tropical Medicine, Keppel Street,  
11 London WC1E 7HT, UK

12  
13 <sup>2</sup> Eye Department, Solomon Island Ministry of Health and Medical Services, Honiara, Solomon  
14 Islands

15  
16 <sup>3</sup> Hospital for Tropical Diseases, University College London Hospitals, Mortimer Market, London

17  
18 <sup>4</sup> Primary Care Department, Lata Hospital, Lata, Santa Cruz, Solomon Islands

19  
20 <sup>5</sup> Bellona Rural Health Centre, Bellona, Solomon Islands

21  
22 <sup>6</sup> The Fred Hollows Foundation, Carlton, Victoria, Australia

23  
24

25 **Abstract**

26

27 Background

28 Several non-chlamydial microbial pathogens are associated with clinical signs of active trachoma in  
29 trachoma endemic communities with a low prevalence of ocular *Chlamydia trachomatis* (*Ct*)  
30 infection. We observed a low prevalence of *Ct* in the Solomon Islands, therefore hypothesised that  
31 the high prevalence of active trachoma could be explained by a common non-chlamydial infection or  
32 by a dominant polymicrobial community dysbiosis.

33

34 Methods

35 We studied DNA from conjunctival swabs collected from 257 Solomon Islanders with active  
36 trachoma and 257 matched controls. Droplet digital PCR was used to test for *Adenoviridae*,  
37 *Haemophilus influenzae*, *Moraxella catarrhalis*, *Staphylococcus aureus*, coagulase-negative  
38 *Staphylococcus* and *Streptococcus pneumoniae*. Polymicrobial community diversity and  
39 composition were studied by sequencing of hypervariable regions of the 16S ribosomal ribonucleic  
40 acid gene in a subset of 54 cases and 53 controls.

41

42 Results

43 Although *Ct* was associated with active trachoma, the number of infections was low (cases: 3.9%,  
44 controls: 0.4%). Estimated prevalence (cases, controls) of each nonchlamydial infection was as  
45 follows: *S. aureus* (1.9%, 1.9%), *Adenoviridae* (1.2%, 1.2%), coagulase-negative *Staphylococcus*  
46 (5.8%, 4.3%), *H. influenzae* (7.4%, 11.7%), *M. catarrhalis* (2.3%, 4.7%) and *S. pneumoniae* (7.0%,  
47 6.2%). There was no statistically significant association between clinical signs of trachoma and  
48 presence or load of any of the non-*Ct* infections that were assayed. Inter-individual variations in the  
49 conjunctival microbiome were characterised by differences in the levels of *Corynebacterium*,  
50 *Propionibacterium*, *Helicobacter* and *Paracoccus*, but diversity and relative abundance of these  
51 specific genera did not differ between cases and controls.

52

53 Discussion

54 It is unlikely that the prevalent trachoma-like follicular conjunctivitis in the Solomon Islands has a  
55 dominant bacterial aetiology. Before implementing community-wide azithromycin distribution for  
56 trachoma, policy makers should consider that clinical signs of trachoma can occur without the  
57 involvement of any azithromycin-susceptible organism.

58 **Introduction**

59

60 Trachoma, caused by *Chlamydia trachomatis* (Ct), is the leading infectious cause of preventable  
61 blindness (1), and is targeted for elimination as a public health problem by 2020 through the SAFE  
62 strategy (**S**urgery, **A**ntibiotics, **F**acial cleanliness and **E**nvironmental improvement). The decision to  
63 implement community-wide trachoma control interventions, which include mass drug administration  
64 (MDA) with azithromycin, is based on population prevalence estimates of one clinical sign of active  
65 trachoma (trachomatous inflammation–follicular [TF]) in the 1–9-year-old age group (2). In the  
66 Solomon Islands, the prevalence of active trachoma is sufficient to warrant MDA but the prevalence  
67 of TT suggests trachoma may not pose a significant public health problem. A recent study of  
68 trachoma in a treatment-naïve population of the Solomon Islands estimated the TF prevalence at  
69 26% but, surprisingly, conjunctival Ct infection was detected in only 1.3% of 1–9 year olds (3).  
70 Whilst Ct infection is not always detectable in TF cases (4, 5), infection prevalence in the Solomon  
71 Islands is far lower than is seen in other countries with similar TF prevalence (3).

72

73 Ct is not the only cause of follicular conjunctivitis. *Moraxella lacunata*, Parinaud’s oculo-glandular  
74 syndrome, atopic conjunctivitis (6), adenovirus (7), and other *Chlamydia* serotypes (8) and species  
75 (9), among others (10), have been suggested as possible causes of TF in trachoma-endemic  
76 populations. A greater diversity of pathogens can be cultured from the conjunctivae of people with  
77 TF (10) and, among bacterial species isolated during a study in Tanzanian children, *Streptococcus*  
78 *pneumoniae*, *Haemophilus influenzae* B and *Haemophilus influenzae* non-type B associated more  
79 strongly than Ct with clinical signs of active trachoma (10). In communities which had received MDA  
80 in The Gambia, *S. pneumoniae* and *H. influenzae* type b infection correlated closely with signs of  
81 active trachoma, whereas *Moraxella catarrhalis* and *Staphylococcus aureus* did not (11). Common  
82 non-chlamydial pathogens are also associated with trachomatous scarring (TS) (12) and recurrence  
83 of trachomatous trichiasis (TT) after surgery (13).

84

85 Although traditionally thought to be 'sterile', several studies have now described polymicrobial  
86 communities colonising the conjunctival epithelium (14, 15). *Staphylococcus*, *Streptococcus*,  
87 *Haemophilus* and *Moraxella* genera can be readily cultured from swabs taken from the inferior fornix  
88 (10–12). Attempts to detect bacteria from the conjunctiva have shown community diversity and  
89 composition to vary significantly between individuals. It is unclear whether a 'core' microbiota  
90 persists at the conjunctiva, but profiles closely related to that of the skin have been reported (16).  
91 *Corynebacterium*, *Propionibacterium*, *Staphylococcus* and *Streptococcus* have been consistently  
92 dominant, whereas other genera such as *Acinetobacter*, *Brevundimonas*, *Pseudomonas*,  
93 *Bradyrhizobium*, *Sphingomonas*, *Bacillus*, *Simonsiella* and *Elizabethkingia* have been identified  
94 more sporadically (17–19). Conjunctival polymicrobial community composition is known to vary with  
95 age and season (20) and appears to be responsive to external stimuli such as regular contact lens  
96 wear (21), however, significant associations with disease have yet to be described (20, 22).

97  
98 We hypothesised that clinical signs of active trachoma in the Solomon Islands where ocular *Ct* is  
99 uncommon could be explained by a common non-chlamydial infection or by a dominant  
100 polymicrobial community dysbiosis.

101

## 102 **Methods**

103

### 104 Study ethics

105

106 Ethical approval was granted by the London School of Hygiene & Tropical Medicine (6319/6360)  
107 and the Solomon Islands National Health Research (HRC13/18) Ethics Committees. A parent or  
108 guardian provided written consent for each child participant.

109

110 **Table 1.** Oligonucleotides used in this study, with assay concentrations derived from *in vitro* optimisation.

| Organism / target                                                                       | Oligo  | Sequence (5'-3')                                       | Concentration in final assay (nM) | Amplicon size | Ref         |
|-----------------------------------------------------------------------------------------|--------|--------------------------------------------------------|-----------------------------------|---------------|-------------|
| <i>C. trachomatis</i> / Plasmid open reading frame 2 ( <i>pORF2</i> )                   | F      | CAG CTT GTA GTC CTG CTT GAG AGA                        | 900                               | 109           | (3, 23, 24) |
|                                                                                         | R      | CAA GAG TAC ATC GGT CAA CGA AGA                        | 900                               |               |             |
|                                                                                         | Probe  | [FAM] CCC CAC CAT TTT TCC GGA GCG A [BHQ1]             | 200                               |               |             |
| <i>S. aureus</i> / Staphylococcal protein A ( <i>SpA</i> )                              | F      | CAG CAA ACC ATG CAG ATG CTA                            | 900                               | 101           | (25, 26)    |
|                                                                                         | R      | CGC TAA TGA TAA TCC ACC AAA TAC A                      | 900                               |               |             |
|                                                                                         | Probe  | [VIC] TCA AGC ATT ACC AGA AAC [MGBNFQ]                 | 250                               |               |             |
| Coagulase-negative <i>Staphylococcus</i> / translation elongation factor ( <i>tuf</i> ) | F      | TAT CCA CGA AAC TTC TAA AAC AAC TGT TAC T              | 450                               | 204           | (25)        |
|                                                                                         | R      | TCT TTA GAT AAT ACG TAT ACT TCA GCT TTG AAT TT         | 450                               |               |             |
|                                                                                         | Probe  | [FAM] TAT TAG ACT ACG CTG AAG CTG GTG ACA ACA T [BHQ1] | 125                               |               |             |
| <i>S. pneumoniae</i> / N-acetylmuramoyl-L-alanine amidase ( <i>lytA</i> )               | F      | ACG CAA TCT AGC AGA TGA AGC A                          | 500                               | 75            | (27)        |
|                                                                                         | R      | TCG TGC GTT TTA ATT CCA GCT                            | 500                               |               |             |
|                                                                                         | Probe  | [FAM] GCC GAA AAC GCT TGA TAC AGG GAG [BHQ1]           | 150                               |               |             |
| <i>H. influenzae</i> / L-fuculokinase ( <i>fucK</i> ) <sup>†</sup>                      | F      | ATG GCG GGA ACA TCA ATG A                              | 900                               | 102           | (28)        |
|                                                                                         | R      | ACG CAT AGG AGG GAA ATG GTT                            | 900                               |               |             |
|                                                                                         | Probe* | [FAM] CGg TAa TTg GGa TCc AT [BHQ1]                    | 125                               |               |             |
| <i>Adenoviridae</i> / capsid assembly protein (hexon)                                   | F      | GCC ACG GTG GGG TTT CTA AAC TT                         | 500                               | 132           | (29)        |
|                                                                                         | R      | GCC CCA GTG GTC TTA CAT GCA CAT C                      | 500                               |               |             |
|                                                                                         | Probe  | [HEX] TGC ACC AGA CCC GGG CTC AGG TAC TCC GA [BHQ1]    | 125                               |               |             |
| <i>M. catarrhalis</i> / outer membrane protein ( <i>copB</i> )                          | F      | GTG AGT GCC GCT TTT ACA ACC                            | 900                               | 72            | (30, 31)    |
|                                                                                         | R      | TGT ATC GCC TGC CAA GAC AA                             | 900                               |               |             |
|                                                                                         | Probe  | [HEX] TGC TTT TGC AGC TGT TAG CCA GCC TAA [BHQ1]       | 250                               |               |             |

111 \* Lower case symbols denote locked nucleic acid bases

112 † These primers do not differentiate between encapsulated and noncapsulated subtype

113 Study population

114

115 The samples tested during this study were a sub-set of specimens from a population-based  
116 trachoma prevalence survey of 3674 people (1135 children aged 1–9 years) in 32 clusters from  
117 Temotu and Rennell & Bellona Provinces, Solomon Islands; data from that survey are presented  
118 elsewhere (3). Sterile swabs were passed three times over the right conjunctiva of every child  
119 before storage in 300  $\mu$ L RNALater® (Life Technologies). Swabs were kept cool in the field for up  
120 to 24hrs then frozen (3). Inclusion criteria for cases (n = 257) were age 1–9 years, detectable  
121 human DNA in the conjunctival swab and a field grade of TF or trachomatous inflammation—  
122 intense (TI) in the right eye. An equal number (n = 257) of age, gender and island matched controls  
123 without TF or TI were selected using the ‘e1071’ R package. A random subset of cases (n = 54) and  
124 controls (n = 53) were further characterized using V1-V3 16S rRNA gene sequencing. Field controls  
125 (clean swabs passed within 20 cm of seated participants, without touching them, and then treated  
126 identically to subjects’ specimens), extraction controls (extraction carried out in the absence of a  
127 specimen and PCR carried out on the eluate) and PCR controls (PCR carried out in the absence of  
128 any added material) were used to determine background levels of microbial contamination in the  
129 16S rRNA gene sequencing protocol.

130

131 Droplet digital PCR

132

133 All individuals in this sample have previously been tested for *Ct* and human RPP30 using DNA  
134 extracted from conjunctival swabs with the Qiagen AllPrep DNA/RNA kit. We chose not to use  
135 mechanical lysis on these low biomass specimens due to the reported lower yields compared to  
136 chemical lysis (32).

137

138 Duplex ddPCR assays were developed for (1) *Adenoviridae* (29) and *S. pneumoniae* (27), (2) *H.*  
139 *influenzae* (28) and *M. catarrhalis* (30, 31), and (3) *S. aureus* and coagulase-negative  
140 *Staphylococcus* (25, 26) based on published assays. Assay performance was assessed by repeat



141 testing of synthetic standard dilution series' and cultured pathogen material before rolling out to  
142 clinical samples (Supplementary Table 1). Each assay contained 10  $\mu$ L 2 $\times$  ddPCR Supermix for  
143 probes (Bio-rad, Hemel Hempstead, UK), primers and probes at custom concentrations (Table 1)  
144 and 8  $\mu$ L of template DNA. Thermal cycling was 10'00" at 95°C then 40x (0'15" at 95°C | 1'00" at  
145 60°C) then 12'00" at 98°C.(23) A positive result for a clinical specimen was defined as >95%  
146 confidence of non-zero target load, as described previously.(23)

147

#### 148 16S rRNA gene sequencing

149

150 An approximately 530-bp region of the 16S ribosomal RNA (rRNA) gene (variable regions 1-3) was  
151 amplified using forward (modified 27F; 5'-[adaptor]-AGAGTTTGGATCCTGGCTCAG-3') and custom  
152 barcoded reverse primers (534R; 5'-[adaptor]-[barcode]-  
153 AGTCAGTCAGCCATTACCGCGGCTGCTGG-3'). Each 15  $\mu$ L reaction contained 7.5  $\mu$ L 2 $\times$   
154 Phusion High Fidelity Master Mix (New England Biosciences, MA, USA), 0.45  $\mu$ L DMSO, 0.1  $\mu$ M  
155 primers and 5.55  $\mu$ L DNA. The thermal cycling conditions were 0'30" at 98°C then 31x (0'10" at  
156 98°C | 0'30" at 62°C | 0'15" at 72°C) then 7'00" at 72°C. Amplicons were cleaned using 0.6 v/v  
157 AMPure XP beads (Beckman Coulter, CA, USA), quantified using Qubit (Thermo Fisher Scientific,  
158 MA, USA) then pooled at equimolar concentrations. The 4 nM sequencing library was mixed 0.75  
159 v/v with a 4 nM Phi-X control library (Illumina, CA, USA). 3  $\mu$ L of 100  $\mu$ M custom read primers were  
160 mixed in to wells 12 (Read 1; CTACACTATGGTAATTGTAGAGTTTGGATCCTGGCTCAG), 13  
161 (Index; CCAGCAGCCGCGGTAATGGCTGACTGACT) and 14 (Read 2;  
162 AGTCAGTCAGCCATTACCGCGGCTGCTGG) of the MiSeq reagents cartridge before 2 x 300 bp  
163 paired-end sequencing with the 600-cycle MiSeq v3 sequencing reagent kit on the MiSeq platform  
164 using a standard protocol (Illumina, CA, USA). 96 uniquely barcoded specimens were run in  
165 multiplex on each MiSeq run.

166

#### 167 Data analysis

168

169 ddPCR data were analysed using R version 3.2.2 (33). Binomial univariate regression was used to  
170 test the relationship between each individual infection and active trachoma. The most accurate final  
171 multivariate model, determined by lowest Akaike Information Criterion (AIC) value, was determined  
172 by step-wise removal of variables from a binomial multivariate regression model incorporating all  
173 tested pathogens. The chance of the *Ct* association occurring due to chance was assessed by  
174 counting the number of significant results obtained from randomly re-ordering the *Ct* data 1000  
175 times.

176

177 Raw 16S amplicon sequences were directly assigned to genera using Illumina BaseSpace '16S  
178 Metagenomics' app version 1.0.1.0, which uses algorithms from Wang and colleagues (34). Two  
179 clinical specimens yielded fewer than 1000 reads in total and were removed from the analysis.  
180 Amplicons were sequenced from six no-template control (NTC) specimens (two 'field' controls, two  
181 'extraction' controls, two 'PCR' controls, defined above) to identify any contaminants endogenous to  
182 the collection, PCR or sequencing process. Any genera represented by more than 600 reads in the  
183 six combined NTCs (average 100 reads per NTC) were eliminated from the clinical specimen  
184 analysis. This resulted in the removal of 21 genera, which accounted for 95.1% of the reads from  
185 NTCs and 88.3% of the reads from clinical specimens. The genera removed included common  
186 contaminants of reagent kits (35) such as *Pelomonas*, as well as some previously described  
187 conjunctival microbiota constituents such as *Brevundimonas*, *Staphylococcus* and *Streptococcus*  
188 (17, 20).

189

190 Between-group differences in the Shannon Diversity Index (a measure of diversity which increases  
191 with increasing species abundance and evenness) and Inverse Simpson Index (another measure of  
192 diversity where 1 is infinite diversity and 0 is no diversity) were compared using a t-test.  
193 Discriminant Analysis of Principal Components (DAPC), a multivariate clustering method to analyse  
194 complex datasets, was performed using the 'adegenet' package in R (36) and cross-validation was

195 used to determine the optimal number of principal components to include in a discriminant function  
196 aimed at separating cases from controls on the basis of their polymicrobial community structures.

197

198

## 199 **Results**

200

### 201 Specimen set demographics

202

203 A total of 257 cases and 257 controls (n = 514) were tested. All 257 cases had TF, and one also  
204 had TI. Case status was defined by clinical signs in the right eye but respectively 8/257 (3.1%) and  
205 236/257 (91.8%) of the controls and cases had TF in the left eye. Both case and control groups  
206 were 38% female. Mean age was 5.6 years (cases) and 5.5 years (controls, student's t test p =  
207 0.76). There was no significant difference between cases and controls in terms of the clusters  
208 represented (Kolmogorov-Smirnov test p = 0.97) and all 32 clusters were represented. The case  
209 specimens had higher loads of human DNA than the controls (18030 versus 9354 copies/swab; p =  
210 0.00003). There were no significant differences in age, gender or location within the subset selected  
211 for 16S-amplicon sequencing.

212

### 213 Quantitative PCR tests for ocular pathogens

214

215 In this study, 19.8% of children had evidence of infection with at least one of the targeted organisms  
216 (table 2). We considered the prevalence of *Ct* in this sample set to be too low (96.1% of TF cases  
217 were infection-negative) to account for the level of active disease. The prevalence of *Adenoviridae*  
218 (1.2%) and *S. aureus* (1.9%) were both very low. There was no association between active  
219 trachoma and infection with *H. influenzae*, *S. pneumoniae*, *S. aureus*, coagulase-negative  
220 *Staphylococcus* or *M. catarrhalis*. *Ct* infection was associated with active trachoma (logistic  
221 regression p = 0.026; odds ratio: 10.4). The association between *Ct* and active trachoma was still  
222 significant in a multivariate analysis (p = 0.025). The permuted p-value for the association between

223 *Ct* and active trachoma was highly significant ( $p = 0.001$ ). Active disease was neither associated  
224 with infection with at least one pathogen (any pathogen,  $p = 0.185$ ) nor the number of concurrent  
225 infections in the same eye (number of concurrent pathogens,  $p = 0.207$ ). Infectious loads of those  
226 who tested positive are shown figure 2. Despite some numerical differences between groups, none  
227 of the differences were statistically significant.

228

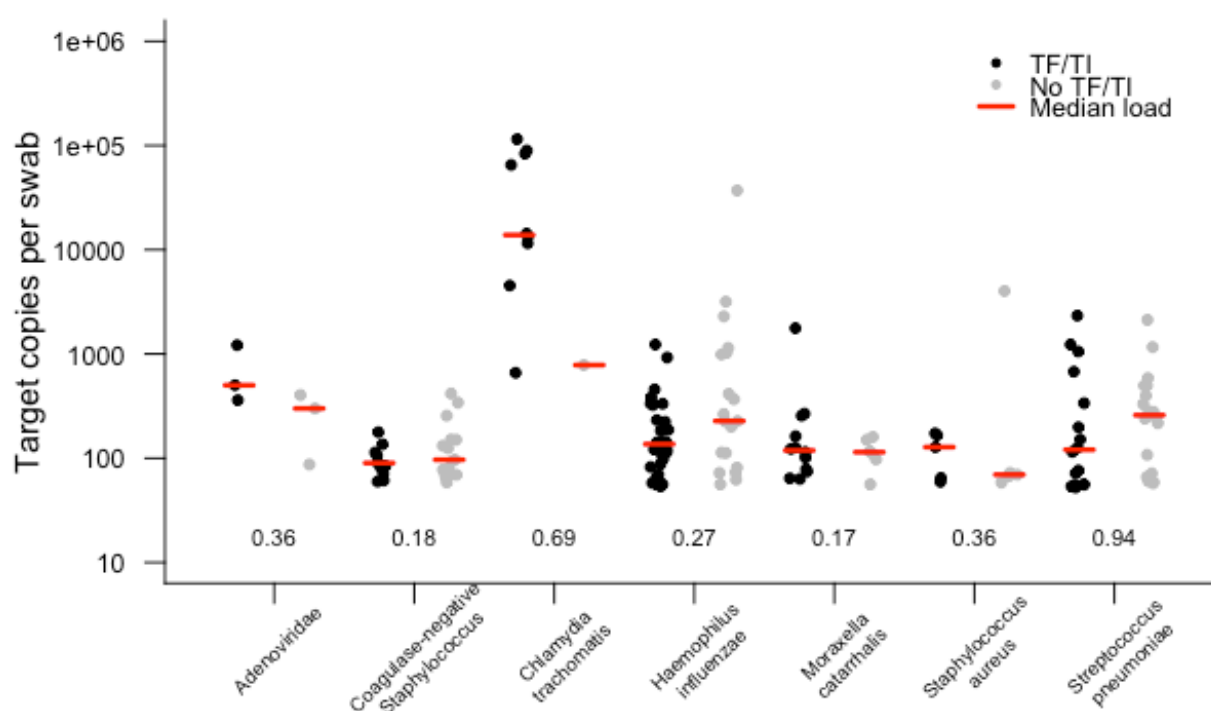

229

230 **Figure 2.** Target copies per swab of each pathogen identified in conjunctival swabs collected from children with and  
231 without active trachoma in the Solomon Islands. Numbers show p-values for logistic regression comparison between  
232 active trachoma case and control groups for each pathogen. None of the differences observed were statistically  
233 significant.

234

Running header: Microbial correlates of active trachoma in the Solomon Islands

235 **Table 2.** Cases of infection in specimens from children with and without active disease. The relationship of those  
 236 infections to trachoma has been tested with univariate logistic regression, and then stepwise removal of variables from  
 237 multivariate regression model was used to determine the final multivariate regression model that provided the best fit for  
 238 the data.

| Pathogen                                 | ddPCR result | No TF/TI (%; n=257) | TF/TI (%; n=257) | Total (%; n=514) | Univariate odds ratio (95% CI) | Univariate p-value | Multivariate odds ratio (95% CI) | Multivariate p-value |           |
|------------------------------------------|--------------|---------------------|------------------|------------------|--------------------------------|--------------------|----------------------------------|----------------------|-----------|
| <i>Adenoviridae</i>                      | Positive     | 3 (1.2)             | 3 (1.2)          | 6 (1.2)          | 1.00                           | 1.000              | -                                | -                    |           |
|                                          | Negative     | 254 (98.8)          | 254 (98.8)       | 508 (98.8)       | (0.67 – 1.50)                  |                    |                                  |                      |           |
| <i>Chlamydia trachomatis*</i>            | Positive     | 1 (0.4)             | 10 (3.9)         | 11 (2.1)         | 10.36 (1.96                    | <b>0.026</b>       | 10.64 (2.15                      | <b>0.025</b>         |           |
|                                          | Negative     | 256 (99.6)          | 247 (96.1)       | 503 (97.9)       | – 190.92)                      |                    |                                  |                      | – 196.00) |
| Coagulase-negative <i>Staphylococcus</i> | Positive     | 15 (5.8)            | 11 (4.3)         | 26 (5.1)         | 0.72 (0.32 –                   | 0.423              | -                                | -                    |           |
|                                          | Negative     | 242 (94.2)          | 246 (95.7)       | 488 (94.9)       | 1.59)                          |                    |                                  |                      |           |
| <i>Haemophilus influenzae</i>            | Positive     | 19 (7.4)            | 30 (11.7)        | 49 (9.5)         | 1.66 (0.91 –                   | 0.101              | -                                | -                    |           |
|                                          | Negative     | 238 (92.6)          | 227 (88.3)       | 465 (90.4)       | 3.07)                          |                    |                                  |                      |           |
| <i>Moraxella catarrhalis</i>             | Positive     | 6 (2.3)             | 12 (4.7)         | 18 (3.5)         | 2.05 (0.78 –                   | 0.158              | 2.13 (0.81 –                     | 0.137                |           |
|                                          | Negative     | 251 (97.7)          | 245 (95.3)       | 496 (96.5)       | 5.96)                          |                    |                                  |                      | 6.20)     |
| <i>Staphylococcus aureus</i>             | Positive     | 5 (1.9)             | 5 (1.9)          | 10 (1.9)         | 1.00 (0.28 –                   | 1.000              | -                                | -                    |           |
|                                          | Negative     | 252 (98.1)          | 252 (98.1)       | 504 (98.1)       | 3.64)                          |                    |                                  |                      |           |
| <i>Streptococcus pneumoniae</i>          | Positive     | 18 (7.0)            | 16 (6.2)         | 34 (6.6)         | 0.88 (0.43 –                   | 0.723              | -                                | -                    |           |
|                                          | Negative     | 239 (93.0)          | 241 (93.8)       | 480 (93.4)       | 1.77)                          |                    |                                  |                      |           |
| Any pathogen                             | Positive     | 45 (17.5)           | 57 (22.2)        | 102 (19.8)       | 0.75 (0.48 –                   | 0.185              | Not included                     |                      |           |
|                                          | Negative     | 212 (82.4)          | 200 (77.8)       | 412 (80.2)       | 1.15)                          |                    |                                  |                      |           |
| Different pathogen species in same eye   | 0            | 212 (82.4)          | 200 (77.8)       | 412 (80.2)       |                                | 1.21 (0.90 –       | Not included                     |                      |           |
|                                          | 1            | 28 (10.9)           | 35 (13.6)        | 63 (12.3)        | 1.63)                          |                    |                                  |                      | 0.207     |
|                                          | >1           | 17 (6.6)            | 22 (8.6)         | 39 (7.6)         |                                |                    |                                  |                      |           |

239 \*Data taken from Butcher *et al.*(3)

240

241 16S rRNA gene sequencing

242

243 The total number of genera identified across all clinical specimens and NTCs was 659, however,  
244 125/659 (19%) had a cumulative total of ten reads or fewer. The median number of reads per  
245 clinical specimen was 55,104 (IQR: 40,705 – 89,541) and the median percentage of reads mapped  
246 to genus level was 51.9%. The median number of genera identified was 151 (IQR: 117 – 212) per  
247 clinical specimen. Following removal of presumed contaminants, approximately 40% of cleaned  
248 reads were assigned to genera that each constituted less than 1% of the total polymicrobial  
249 community. 40 genera were represented by at least 1% of remaining reads in clinical samples.

250

251 The diversity of bacterial communities was in general low; the mean Inverse Simpsons Diversity  
252 index over all specimens was 0.061 (IQR: 0.046 – 0.092). There was no significant difference in  
253 alpha-diversity between cases and controls by either measure of diversity. The median Inverse  
254 Simpson's Diversity index in cases was 0.061 [IQR: 0.048 – 0.095] versus controls 0.060 [IQR:  
255 0.044 – 0.078] (Student's t-test  $p = 0.56$ ). The median Shannon Diversity Index was 3.38 in cases  
256 and 3.37 in controls (Student's t-test  $p = 0.96$ ). In cases of active trachoma, the most dominant  
257 bacterial genera were *Corynebacterium* (12.0% of total reads), *Propriobacterium* (6.2%) and  
258 *Helicobacter* (4.8%). In controls, the most dominant genera were *Corynebacterium* (13.9%),  
259 *Paracoccus* (5.2%), *Propriobacterium* (4.7%), and *Neisseria* (4.1%) (supplementary figure 2). The  
260 genus level membership of the bacterial community varied between cases and controls. Of 21  
261 genera found in specimens from those with active trachoma, 10 were not found in controls,  
262 including *Helicobacter*, *Mesoplasma*, *Brachybacterium* and *Haemophilus*. Of 23 genera found in  
263 controls, 12 were not found in cases, including *Neisseria*, *Prevotella*, *Rhodococcus* and  
264 *Porphyromonas*.

265

266 Principal Components (PC) Analysis (figure 2) revealed that 47% of the total variation in the  
267 microbiomes of children in the Solomon Islands is dominated by *Corynebacterium* (PC1),

268 *Paracoccus* (PC2), *Propionibacterium* (PC2,PC3) and *Helicobacter* (PC3). While individual cases or  
269 controls have distinctive profiles dominated by these genera, the majority of cases and controls are  
270 indistinguishable (figure 2) using the first three PCs (explaining 45% of total variation). We  
271 condensed PCs 1-20 into a single discriminant function, which explained 92% of variation in the  
272 data. In this analysis, the genus-level polymicrobial community structure is significantly different  
273 between cases and controls (logistic regression  $p = 0.0000013$ ) (figure 3). That discriminant  
274 function was dominated by a number of genera such as *Curvibacterium* and *Mesoplasma*  
275 (Supplementary Figure 4). Cross validation to predict group membership using discriminant  
276 functions of between 10 and 90 PCs had a low success rate (median 53.3% success, range: 50.1 –  
277 62.3%). This suggests that while differences do exist between the polymicrobial communities in  
278 cases and controls, they are too subtle and varied to be predictive of phenotype, at least when  
279 working with this number of specimens.

280

281

**A**

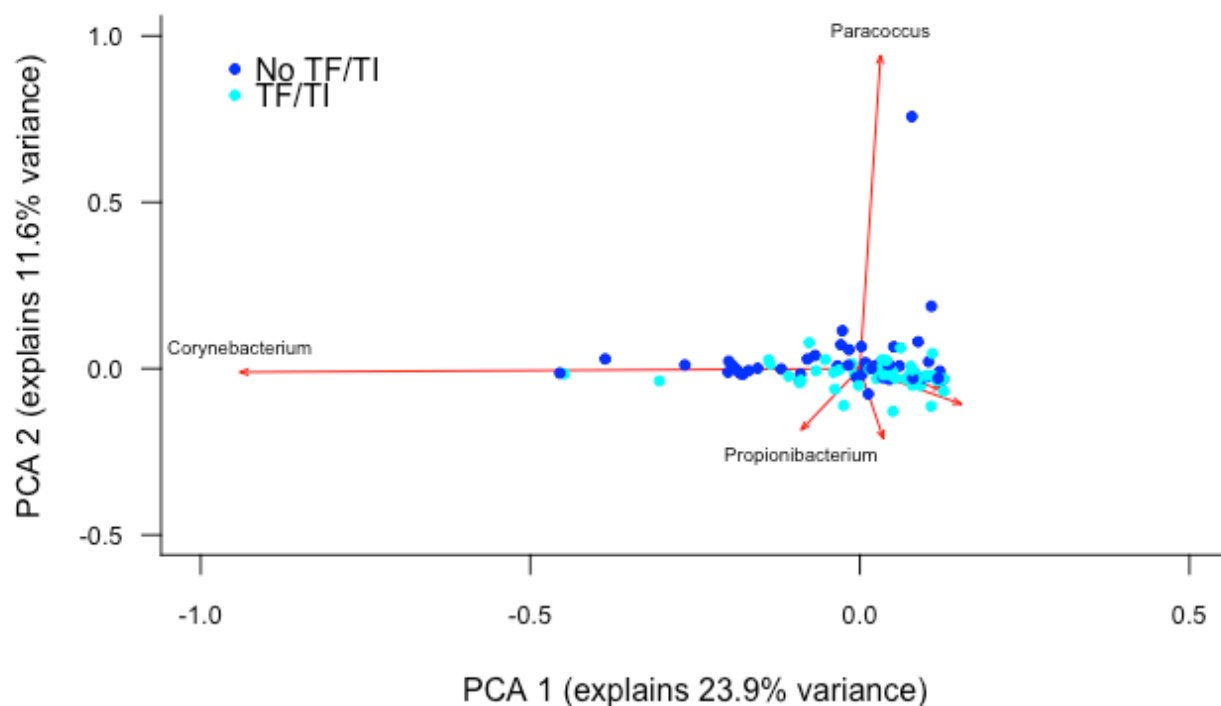

282

**B**

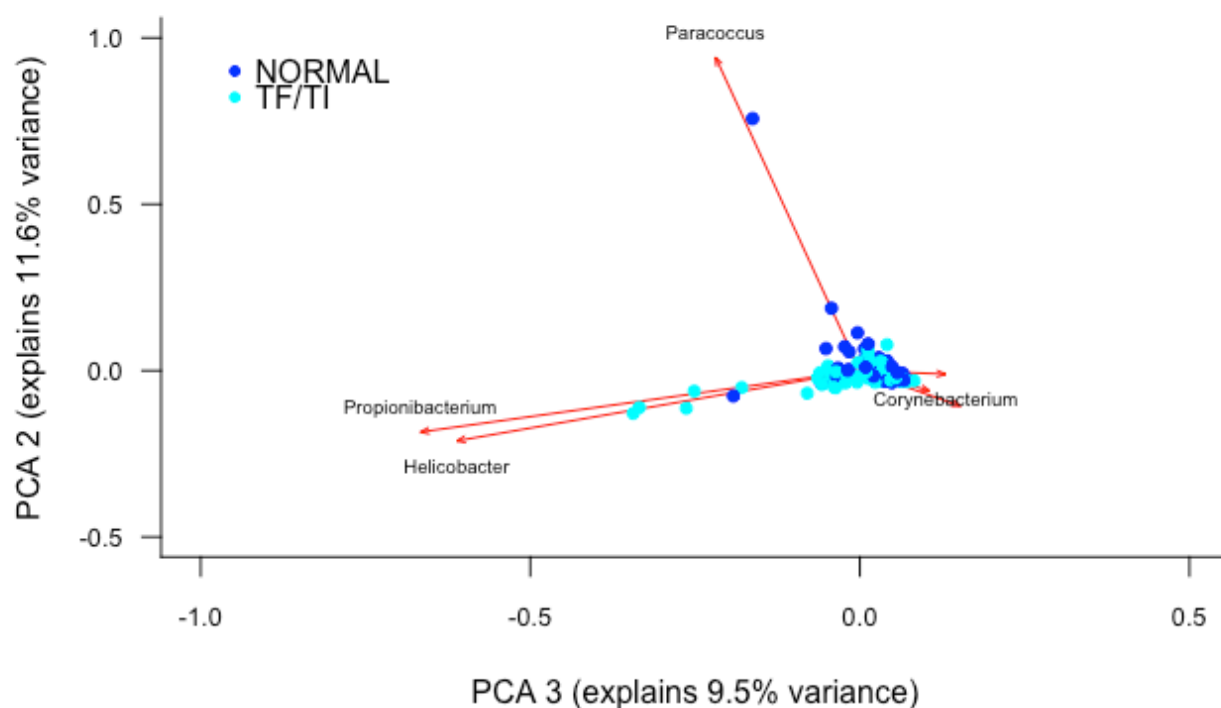

283 **Figure 2. (A)** First and second and **(B)** second and third principal components describing variation between the 16S  
284 sequences identified in Solomon Island children with and without active trachoma. Dark blue spots indicate controls. Light  
285 blue spots indicate cases. Red arrows show principal component loadings.



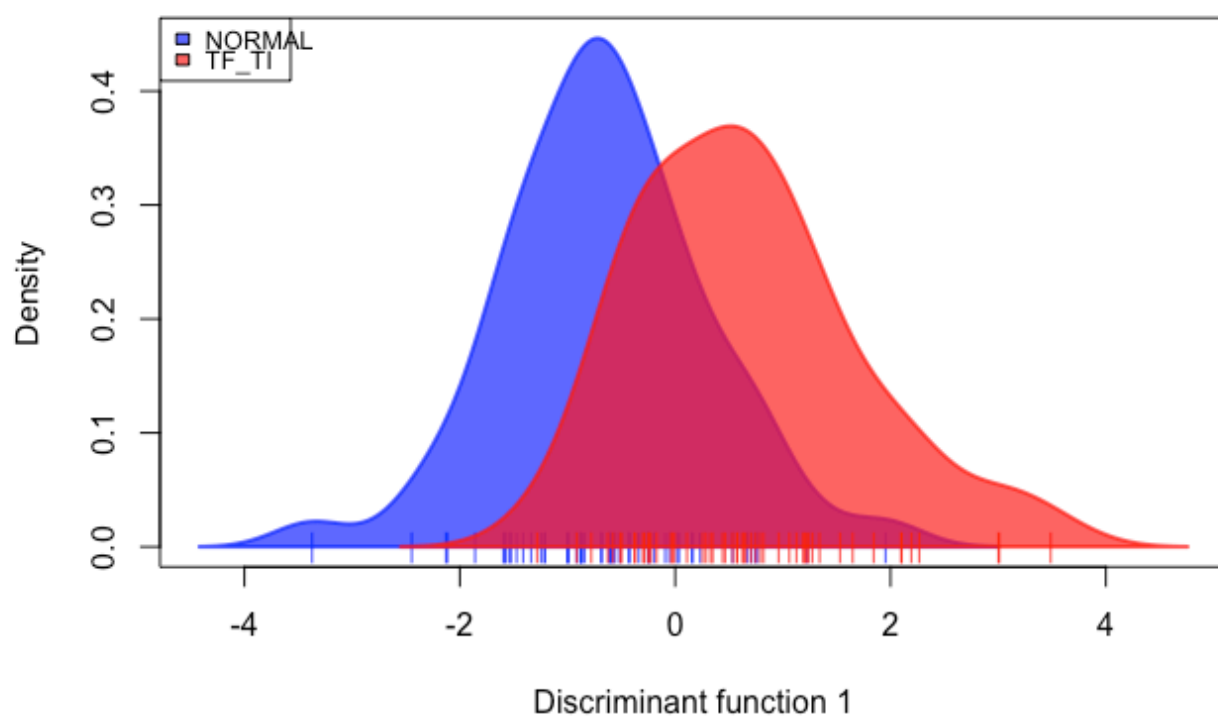

286

287 **Figure 3:** Discriminant analysis of the association of 20 combined principal components with active trachoma, showing a  
288 significant discrimination of phenotype groups ( $p = 0.0000013$ ).

289

290

291 **Discussion**

292

293 Follicular conjunctivitis meeting WHO criteria for the trachoma phenotype “TF” is highly prevalent in  
294 the Solomon Islands, but the prevalence of *Ct* infection is curiously low. Although *Ct* was the only  
295 pathogen to associate with TF in this study, the prevalence was much lower than may be expected  
296 of a population with this level of TF (3). By ddPCR testing for a number of bacteria and viruses that  
297 have previously been linked to TF, we can discount the possibility that any of them can account  
298 either singly or *en masse* for the high TF prevalence. Both *S. pneumoniae* and *H. influenzae* were  
299 detected at moderate prevalence in our population, whilst we found very few cases of *Adenoviridae*  
300 and *M. catarrhalis* infection. Comparator data from other populations are scarce, but it is clear that  
301 staphylococcal species were detected in the conjunctivae in the Solomon Islands at a substantially  
302 lower prevalence (7%) than in children in either Tanzania (14.8% *S. epidermidis*) (10), Sierra Leone  
303 (20% *S. aureus*, 29% coagulase-negative *Staphylococcus*) (37) or The Gambia (post MDA, 14.7%  
304 *S. aureus*) (11). Through 16S amplicon sequencing and community profiling, we have shown that  
305 there is apparently no dominant bacterial genus associated with this disease. The dominant  
306 features of variation in conjunctival bacterial communities in Solomon Islands children  
307 (*Corynebacterium*, *Propionibacterium*) have consistently been identified in other studies. Other  
308 genera (e.g., *Paracoccus*, *Helicobacter*, *Haemophilus*) have not previously been identified in 16S  
309 studies, whilst some reported in other studies (e.g., *Simonsella*, *Pseudomonas*) were not found in  
310 these specimens.(17–20) Many studies have sequenced the V3-4 region of the 16S gene whereas  
311 we targeted V1-3. V region choice has been shown to have an impact on the genera identified at  
312 other mucosal sites (38) and, while no data have yet emerged on how this affects profiles from the  
313 eye, it is possible this could account for some of the differences. Consistent with previous studies  
314 (35), we found a background of genera that amplified in NTCs that also appeared in clinical  
315 specimens. The microbiological biomass at the conjunctiva is known to be very low, even compared  
316 with other nearby sites such as skin or oral mucosa (18). When true resident bacteria are scarce,  
317 16S rRNA gene PCR readily amplifies reagent contaminants. We took stringent measures to  
318 exclude reagent contaminants, but this resulted in the removal of some important genera such as

319 *Staphylococcus* and *Streptococcus*. Among the biggest contributors to between-conjunctiva  
320 variation were *Corynebacterium* and *Propionibacterium*, but these genera did not differentiate TF  
321 cases from controls (figure 2). Previous investigations of the role of the conjunctival microbiome in  
322 ocular disease have also not shown significant differences. People with ocular manifestations of  
323 rosacea, Sjögren's syndrome and healthy controls did not have significant differences in diversity or  
324 relative abundance of key phyla identified across all three groups (22). In The Gambia, there was an  
325 increased abundance of *Haemophilus* in cases of TF, as compared to controls. The abundance of  
326 *Corynebacterium* and *Streptococcus* varied between scarred and non-scarred individuals. However,  
327 neither trachoma-related difference was significant (20).

328

329 The microbiota of these children were heterogeneous and had subtle variations that appeared to  
330 reach significant association with TF when the full community structure was considered in  
331 comparative statistical models. It remains possible (though perhaps unlikely) that a multitude of  
332 factors, operating at the level of single bacterial species, polymicrobial communities or viral species,  
333 all contribute to the presentation of the phenotype. It is perhaps more likely that as yet unidentified  
334 viral or allergic causes could explain the prevalence of TF in the Solomon Islands.

335

336 There are some limitations to our study. Although the ddPCR assays are based on validated assays  
337 and appear to be accurate (supplementary table 1), they have not been formally evaluated in this  
338 format. By not using mechanical lysis in our extraction process, the absolute prevalence of some  
339 difficult-to-lyse Gram positive genera may have been under-estimated, although this would not  
340 impair the comparison of cases to controls, between which protocols were consistent. 16S amplicon  
341 sequencing of low biomass samples is known to result in amplification of reagent and environmental  
342 contaminants (35). This study focused on gross differences in community structure between those  
343 with and without disease and these should be independent of contaminating reads. We also  
344 employed stringent quality control measures to ensure data were not confused by artefacts of the  
345 sequencing process.

346

347 Public health scenarios such as the one in the Solomon Islands will become increasingly common  
348 as trachoma elimination programmes reduce the global prevalence of *Ct*, and the positive predictive  
349 value of TF for ocular *Ct* infection declines as a result (39). MDA might be inappropriately delivered  
350 when clinical signs of trachoma are the only indicator used for programmatic decision making. While  
351 MDA is effective for the treatment of trachoma (40), mass antibiotic exposure may increase  
352 macrolide resistance in nonchlamydial bacteria (41) and theoretically could make the population  
353 more susceptible to later infections by preventing accumulation of acquired immunity to *Ct* (42) and  
354 decisions to undertake such a program should therefore be carefully considered. The case for using  
355 tests for *Ct* infection during trachoma surveys is strengthened by our data. The value of nucleic acid  
356 amplification tests for detecting non-chlamydial infection remains questionable, as multiple  
357 infectious agents might be important, and these are likely to differ between populations. Key  
358 questions now include whether non-chlamydial follicular conjunctivitis such as this responds to MDA  
359 and whether it is linked to incident or progressive scarring which may lead to blindness.

360

#### 361 Acknowledgements

362

363 We thank the residents of the communities who took part in this study, Victoria Miari and Emma  
364 Cobb (Pathogen Molecular Biology Department, London School of Hygiene & Tropical Medicine,  
365 UK) for providing bacterial culture isolates for PCR assay validation, and David Nelson (Indiana  
366 University, Indianapolis, US) for the provision of 16S sequencing primers and protocols.

367

#### 368 Financial statement

369 Fieldwork was jointly funded by the United Kingdom's Department for International Development  
370 Global Trachoma Mapping Project grant (ARIES: 203145) to Sightsavers, and by the Fred Hollows  
371 Foundation, Australia (1041). Laboratory costs were funded by the Fred Hollows Foundation,  
372 Australia (1041).

373 RMRB and AWS were funded by a Wellcome Trust Intermediate Fellowship to AWS (098521).

374 OS, KJ, EK, LS and CR were employed by the Solomon Islands Ministry of Health and Medical  
375 Services for the duration of the survey.

376 MJH is supported by the Wellcome Trust (093368/Z/10/Z).

377 ChR is supported by the Wellcome Trust Institutional Strategic Support Fund (105609/Z/14/Z).

378

### 379 Author Contributions

380 Conceived and designed the study: RMRB, OS, RTLM, AWS, DCWM, ChR.

381 Performed the fieldwork: RMRB, OS, EK, KJ, LS, CR.

382 Performed the experiments: RMRB, MJH, JH, CP, ChR.

383 Analysed the data: RMRB, ChR.

384 Wrote the manuscript: RMRB, ChR.

385 Revised and approved the manuscript: RMRB, OS, EK, KJ, LS, CR, JH, CP, MJH, RTLM, AWS,  
386 DCWM, ChR.

387

388

### 389 References

390

- 391 1. Bourne RA, Stevens GA, White RA, Smith JL, Flaxman SR, Price H, Jonas JB, Keeffe J,  
392 Leasher J, Naidoo K, Pesudovs K, Resnikoff S, Taylor HR, Vision Loss Expert G. 2013.  
393 Causes of vision loss worldwide, 1990-2010: a systematic analysis. Lancet Glob Heal  
394 1:e339-49.
- 395 2. World Health Organization. 2003. Report of the 2nd Global Scientific Meeting on Trachoma.  
396 25-27 August. Geneva, Switzerland.

- 397 3. Butcher RMR, Sokana O, Jack K, Macleod CK, Marks ME, Kalae E, Sui L, Russell C, Tutill  
398 HJ, Williams RJ, Breuer J, Willis R, Le Mesurier RT, Mabey DCW, Solomon AW, Roberts CH.  
399 2016. Low Prevalence of Conjunctival Infection with *Chlamydia trachomatis* in a Treatment-  
400 Naïve Trachoma-Endemic Region of the Solomon Islands. *PLoS Negl Trop Dis* 10:e0004863.
- 401 4. Thein J, Zhao P, Liu H, Xu J, Jha H, Miao Y, Pizzarello L, Tapert L, Schachter J, Mabon M,  
402 Osaki-Holm S, Lietman T, Paxton A. 2002. Does clinical diagnosis indicate ocular chlamydial  
403 infection in areas with a low prevalence of trachoma? *Ophthalmic Epidemiol* 9:263–9.
- 404 5. Grassly NC, Ward ME, Ferris S, Mabey DC, Bailey RL. 2008. The natural history of trachoma  
405 infection and disease in a Gambian cohort with frequent follow-up. *PLoS Negl Trop Dis*  
406 2:e341.
- 407 6. Dawson CR, Jones BR, Tarizzo ML, World Health Organization. 1981. Guide to trachoma  
408 control in programmes for the prevention of blindness. Geneva, Switzerland.
- 409 7. Jhanji V, Chan TCYY, Li EYMM, Agarwal K, Vajpayee RB. 2015. Adenoviral  
410 keratoconjunctivitis. *Surv Ophthalmol* 60:435–443.
- 411 8. Andersson P, Harris SR, Smith HMBS, Hadfield J, O'Neill C, Cutcliffe LT, Douglas FP, Asche  
412 LV, Mathews JD, Hutton SI, Sarovich DS, Tong SYC, Clarke IN, Thomson NR, Giffard PM.  
413 2016. *Chlamydia trachomatis* from Australian Aboriginal people with trachoma are  
414 polyphyletic composed of multiple distinctive lineages. *Nat Commun* 7:10688.
- 415 9. Lietman T, Brooks D, Moncada J, Schachter J, Dawson C, Dean D. 1998. Chronic follicular  
416 conjunctivitis associated with *Chlamydia psittaci* or *Chlamydia pneumoniae*. *Clin Infect Dis*  
417 26:1335–40.
- 418 10. Burton MJ, Hu VH, Massae P, Burr SE, Chevallier C, Afwamba IA, Courtright P, Weiss HA,  
419 Mabey DCW, Bailey RL. 2011. What is causing active trachoma? The role of nonchlamydial  
420 bacterial pathogens in a low prevalence setting. *Invest Ophthalmol Vis Sci* 52:6012–6017.
- 421 11. Burr SE, Hart JD, Edwards T, Baldeh I, Bojang E, Harding-Esch EM, Holland MJ, Lietman  
422 TM, West SK, Mabey DCW, Sillah A, Bailey RL. 2013. Association between ocular bacterial  
423 carriage and follicular trachoma following mass azithromycin distribution in The Gambia.  
424 *PLoS Negl Trop Dis* 7:e2347.

- 425 12. Hu VH, Massae P, Weiss HA, Chevallier C, Onyango JJ, Afwamba IA, Mabey DCW, Bailey  
426 RL, Burton MJ. 2011. Bacterial infection in scarring trachoma. *Invest Ophthalmol Vis Sci*  
427 52:2181–6.
- 428 13. Burton MJ, Adegbola RA, Kinteh F, Ikumapayi UN, Foster A, Mabey DCW, Bailey RL. 2007.  
429 Bacterial infection and trachoma in the gambia: a case control study. *Invest Ophthalmol Vis*  
430 *Sci* 48:4440–4.
- 431 14. Kugadas A, Gadjeva M. 2016. Impact of Microbiome on Ocular Health. *Ocul Surf* 14:342–9.
- 432 15. Lu LJ, Liu J. 2016. Focus: Microbiome: Human Microbiota and Ophthalmic Disease. *Yale J*  
433 *Biol Med* 89:325.
- 434 16. Zhou Y, Gao H, Mihindukulasuriya KA, La Rosa PS, Wylie KM, Vishnivetskaya T, Podar M,  
435 Warner B, Tarr PI, Nelson DE, Fortenberry JD, Holland MJ, Burr SE, Shannon WD,  
436 Sodergren E, Weinstock GM. 2013. Biogeography of the ecosystems of the healthy human  
437 body. *Genome Biol* 14:R1.
- 438 17. Dong Q, Brulc JM, Iovieno A, Bates B, Garoutte A, Miller D, Revanna K V, Gao X,  
439 Antonopoulos DA, Slepak VZ, Shestopalov VI. 2011. Diversity of bacteria at healthy human  
440 conjunctiva. *Invest Ophthalmol Vis Sci* 52:5408–13.
- 441 18. Doan T, Akileswaran L, Andersen D, Johnson B, Ko N, Shrestha A, Shestopalov V, Lee CS,  
442 Lee AY, Van Gelder RN. 2016. Paucibacterial Microbiome and Resident DNA Virome of the  
443 Healthy Conjunctiva. *Investig Ophthalmology Vis Sci* 57:5116.
- 444 19. Huang Y, Yang B, Li W. 2016. Defining the normal core microbiome of conjunctival microbial  
445 communities. *Clin Microbiol Infect* 22:643.e7-643.e12.
- 446 20. Zhou Y, Holland MJ, Makalo P, Joof H, Roberts CH, Mabey D, Bailey RL, Burton MJ,  
447 Weinstock GM, Burr SE. 2014. The conjunctival microbiome in health and trachomatous  
448 disease: a case control study. *Genome Med* 6:99.
- 449 21. Shin H, Price K, Albert L, Dodick J, Park L, Dominguez-Belloa MG. 2016. Changes in the eye  
450 microbiota associated with contact lens wearing. *MBio* 7:1–6.
- 451 22. de Paiva CS, Jones DB, Stern ME, Bian F, Moore QL, Corbiere S, Streckfus CF, Hutchinson  
452 DS, Ajami NJ, Petrosino JF, Pflugfelder SC. 2016. Altered Mucosal Microbiome Diversity and

- 453 Disease Severity in Sjögren Syndrome. *Sci Rep* 6:23561.
- 454 23. Roberts CH, Last A, Molina-Gonzalez S, Cassama E, Butcher R, Nabicassa M, McCarthy E,  
455 Burr SE, Mabey DC, Bailey RL, Holland MJ. 2013. Development and Evaluation of a Next-  
456 Generation Digital PCR Diagnostic Assay for Ocular *Chlamydia trachomatis* Infections. *J Clin*  
457 *Microbiol* 51:2195–203.
- 458 24. Last AR, Roberts CH, Cassama E, Nabicassa M, Molina-Gonzalez S, Burr SE, Mabey DCW,  
459 Bailey RL, Holland MJ. 2013. Plasmid copy number and disease severity in naturally  
460 occurring ocular *Chlamydia trachomatis* infection. *J Clin Microbiol* 52:324.
- 461 25. Okolie CE, Wooldridge KG, Turner DP, Cockayne A, James R. 2015. Development of a new  
462 pentaplex real-time PCR assay for the identification of poly-microbial specimens containing  
463 *Staphylococcus aureus* and other staphylococci, with simultaneous detection of  
464 staphylococcal virulence and methicillin resistance markers. *Mol Cell Probes* 29:144–50.
- 465 26. Nakagawa S, Taneike I, Mimura D, Iwakura N, Nakayama T, Emura T, Kitatsuji M, Fujimoto  
466 A, Yamamoto T. 2005. Gene sequences and specific detection for Pantone-Valentine  
467 leukocidin. *Biochem Biophys Res Commun* 328:995–1002.
- 468 27. Carvalho M da GS, Tondella ML, McCaustland K, Weidlich L, McGee L, Mayer LW,  
469 Steigerwalt A, Whaley M, Facklam RR, Fields B, Carlone G, Ades EW, Dagan R, Sampson  
470 JS. 2007. Evaluation and improvement of real-time PCR assays targeting *lytA*, *ply*, and *psaA*  
471 genes for detection of pneumococcal DNA. *J Clin Microbiol* 45:2460–6.
- 472 28. Meyler KL, Meehan M, Bennett D, Cunney R, Cafferkey M. 2012. Development of a  
473 diagnostic real-time polymerase chain reaction assay for the detection of invasive  
474 *Haemophilus influenzae* in clinical samples. *Diagn Microbiol Infect Dis* 74:356–62.
- 475 29. Heim A, Ebnet C, Harste G, Pring-Akerblom P. 2003. Rapid and quantitative detection of  
476 human adenovirus DNA by real-time PCR. *J Med Virol* 70:228–39.
- 477 30. Kais M, Spindler C, Kalin M, Ortqvist A, Giske CG. 2006. Quantitative detection of  
478 *Streptococcus pneumoniae*, *Haemophilus influenzae*, and *Moraxella catarrhalis* in lower  
479 respiratory tract samples by real-time PCR. *Diagn Microbiol Infect Dis* 55:169–78.
- 480 31. Greiner O, Day PJR, Altwegg M, Nadal D. 2003. Quantitative detection of *Moraxella*



- 481           catarrhalis in nasopharyngeal secretions by real-time PCR. *J Clin Microbiol* 41:1386–90.
- 482   32.   Abusleme L, Hong B-Y, Dupuy AK, Strausbaugh LD, Diaz PI. 2014. Influence of DNA  
483           extraction on oral microbial profiles obtained via 16S rRNA gene sequencing. *J Oral Microbiol*  
484           6.
- 485   33.   R Core Team. 2014. *R: A Language and Environment for Statistical Computing*. R Found  
486           Stat Comput.
- 487   34.   Wang Q, Garrity GM, Tiedje JM, Cole JR. 2007. Naive Bayesian Classifier for Rapid  
488           Assignment of rRNA Sequences into the New Bacterial Taxonomy. *Appl Environ Microbiol*  
489           73:5261–5267.
- 490   35.   Salter SJ, Cox MJ, Turek EM, Calus ST, Cookson WO, Moffatt MF, Turner P, Parkhill J,  
491           Loman NJ, Walker AW, Kunin V, Engelbrektsen A, Ochman H, Hugenholtz P, Fv W, Göbel U,  
492           Stackebrandt E, Kulakov L, McAlister M, Ogden K, Larkin M, O’Hanlon J, McAlister M,  
493           Kulakov L, O’Hanlon J, Larkin M, Ogden K, Kéki Z, Grébner K, Bohus V, Márialigeti K, Tóth  
494           E, Bohus V, Kéki Z, Márialigeti K, Baranyi K, Patek G, Schunk J, Tóth E, McFeters G,  
495           Broadaway S, Pyle B, Egozy Y, Nogami T, Ohto T, Kawaguchi O, Zaitso Y, Sasaki S, Shen  
496           H, Rogelj S, Kieft T, Rand K, Houck H, Maiwald M, Ditton H, Sonntag H, Doeberitz M von K,  
497           Tanner M, Goebel B, Dojka M, Pace N, Corless C, Guiver M, Borrow R, Edwards-Jones V,  
498           Kaczmarek E, Fox A, Grahn N, Olofsson M, Ellnebo-Svedlund K, Monstein H, Jonasson J,  
499           Newsome T, Li B, Zou N, Lo S, Mohammadi T, Reesink H, Vandenbroucke-Grauls C,  
500           Savelkoul P, Barton H, Taylor N, Lubbers B, Pemberton A, Laurence M, Hatzis C, Brash D,  
501           Oberauner L, Zachow C, Lackner S, Högenauer C, Smolle K, Berg G, Duc M La, Kern R,  
502           Venkateswaran K, Ling Z, Liu X, Luo Y, Yuan L, Nelson K, Wang Y, Xiang C, Li L, Benítez-  
503           Páez A, Álvarez M, Belda-Ferre P, Rubido S, Mira A, Tom I, Amar J, Serino M, Lange C,  
504           Chabo C, Iacovoni J, Mondot S, Lepage P, Klopp C, Mariette J, Bouchez O, Perez L,  
505           Courtney M, Marre M, Klopp P, Lantieri O, Doré J, Charles M, Balkau B, Burcelin R, Branton  
506           W, Ellestad K, Maingat F, Wheatley B, Rud E, Warren R, Holt R, Surette M, Power C,  
507           Borewicz K, Pragman A, Kim H, Hertz M, Wendt C, Isaacson R, Dong Q, Brulc J, Iovieno A,  
508           Bates B, Garoutte A, Miller D, Revanna K, Gao X, Antonopoulos D, Slepak V, Shestopalov V,

509 Xuan C, Shamonki J, Chung A, DiNome M, Chung M, Sieling P, Lee D, Kuehn J, Gorden P,  
510 Munro D, Rong R, Dong Q, Plummer P, Wang C, Phillips G, Srinivas G, Möller S, Wang J,  
511 Künzel S, Zillikens D, Baines J, Ibrahim S, Boissière A, Tchioffo M, Bachar D, Abate L, Marie  
512 A, Nsango S, Shahbazkia H, Awono-Ambene P, Levashina E, Christen R, Morlais I,  
513 McKenzie V, Bowers R, Fierer N, Knight R, Lauber C, Carlos C, Torres T, Ottoboni L, Cheng  
514 X, Tian X, Wang Y, Lin R, Mao Z, Chen N, Xie B, Davidson S, Powell R, James S, Knowlton  
515 C, Veerapaneni R, D'Elia T, Rogers S, Shtarkman Y, Koçer Z, Edgar R, Veerapaneni R,  
516 D'Elia T, Morris P, Rogers S, DeLeon-Rodriguez N, Lathem T, Rodriguez-R L, Barazesh J,  
517 Anderson B, Beyersdorf A, Ziemba L, Bergin M, Nenes A, Konstantinidis K, Turner P, Turner  
518 C, Jankhot A, Helen N, Lee S, Day N, White N, Nosten F, Goldblatt D, Willerslev E, Hansen  
519 A, Poinar H, Kearney M, Spindler J, Wiegand A, Shao W, Anderson E, Maldarelli F, Ruscetti  
520 F, Mellors J, Hughes S, Grice S Le, Coffin J, Cooper A, Poinar H, Roberts C, Ingham S,  
521 Segal L, Alekseyenko A, Clemente J, Kulkarni R, Wu B, Chen H, Berger K, Goldring R, Rom  
522 W, Blaser M, Weiden M, Bhatt A, Freeman S, Herrera A, Peadamallu C, Gevers D, Duke F,  
523 Jung J, Michaud M, Walker B, Young S, Earl A, Kostic A, Ojesina A, Hasserjian R, Ballen K,  
524 Chen Y, Hobbs G, Antin J, Soiffer R, Baden L, Garrett W, Hornick J, Marty F, Meyerson M,  
525 Deragon J, Sinnett D, Mitchell G, Potier M, Labuda D, Sarkar G, Sommer S, Klaschik S,  
526 Lehmann L, Raadts A, Hoefl A, Stuber F, Tamariz J, Voynarovska K, Prinz M, Caragine T,  
527 Hilali F, Saulnier P, Chachaty E, Andremont A, Heininger A, Binder M, Ellinger A, Botzenhart  
528 K, Unertl K, Döring G, Silkie S, Tolcher M, Nelson K, Carroll N, Adamson P, Okhravi N,  
529 Mohammadi T, Reesink H, Vandenbroucke-Grauls C, Savelkoul P, Hughes M, Beck L, Skuce  
530 R, Vaishampayan P, Probst A, Duc M La, Bargoma E, Benardini J, Andersen G,  
531 Venkateswaran K, Rueckert A, Morgan H, Patel P, Garson J, Tettmar K, Ancliff S, McDonald  
532 C, Pitt T, Coelho J, Tedder R, Champlot S, Berthelot C, Pruvost M, Bennett E, Grange T,  
533 Geigl E, Chang S, Hsu H, Cheng J, Tseng C, Bonfert T, Csaba G, Zimmer R, Friedel C,  
534 Knights D, Kuczynski J, Charlson E, Zaneveld J, Mozer M, Collman R, Bushman F, Knight R,  
535 Kelley S, Eren A, Maignen L, Sul W, Murphy L, Grim S, Morrison H, Sogin M, Morris A, Beck  
536 J, Schloss P, Campbell T, Crothers K, Curtis J, Flores S, Fontenot A, Ghedin E, Huang L,

537 Jablonski K, Kleerup E, Lynch S, Sodergren E, Twigg H, Young V, Bassis C, Venkataraman  
538 A, Schmidt T, Weinstock G, Lane D, Klindworth A, Pruesse E, Schweer T, Peplies J, Quast  
539 C, Horn M, Glöckner F, Cooper P, Walker A, Reyes J, Chico M, Salter S, Vaca M, Parkhill J,  
540 Schloss P, Westcott S, Ryabin T, Hall J, Hartmann M, Hollister E, Lesniewski R, Oakley B,  
541 Parks D, Robinson C, Sahl J, Stres B, Thallinger G, Horn D Van, Weber C, Kozich J,  
542 Westcott S, Baxter N, Highlander S, Schloss P, Quince C, Lanzen A, Davenport R,  
543 Turnbaugh P, Bolger A, Lohse M, Usadel B, Kielbasa S, Wan R, Sato K, Horton P, Frith M,  
544 Huson D, Mitra S, Ruscheweyh H, Weber N, Schuster S, Schloss P, Gevers D, Westcott S,  
545 White J, Nagarajan N, Pop M. 2014. Reagent and laboratory contamination can critically  
546 impact sequence-based microbiome analyses. *BMC Biol* 12:87.

547 36. Jombart T, Devillard S, Balloux F, Falush D, Stephens M, Pritchard J, Pritchard J, Stephens  
548 M, Donnelly P, Corander J, Waldmann P, Sillanpaa M, Tang J, Hanage W, Fraser C,  
549 Corander J, Lee C, Abdool A, Huang C, Jombart T, Jombart T, Devillard S, Dufour A, Pontier  
550 D, Jombart T, Pontier D, Dufour A, McVean G, Novembre J, Stephens M, Patterson N, Price  
551 A, Reich D, Price A, Patterson N, Plenge R, Weinblatt M, Shadick N, Reich D, Hotelling H,  
552 Hotelling H, Pearson K, Liu N, Zhao H, Fisher R, Lachenbruch P, Goldstein M, Aitchison J,  
553 Reymont R, Beharav A, Nevo E, Fraley C, Raftery A, Cann H, Toma C de, Cazes L, Legrand  
554 M, Morel V, Piouffre L, Bodmer J, Bodmer W, Bonne-Tamir B, Cambon-Thomsen A,  
555 Ramachandran S, Deshpande O, Roseman C, Rosenberg N, Feldman M, Cavalli-Sforza L,  
556 Rosenberg N, Pritchard J, Weber J, Cann H, Kidd K, Zhivotovsky L, Feldman M, Wang S,  
557 Lewis C, Jakobsson M, Ramachandran S, Ray N, Bedoya G, Rojas W, Parra M, Molina J,  
558 Gallo C, Balloux F, Rosenberg N, Mahajan S, Ramachandran S, Zhao C, Pritchard J,  
559 Feldman M, Rambaut A, Pybus O, Nelson M, Viboud C, Taubenberger J, Holmes E, Russell  
560 C, Jones T, Barr I, Cox N, Garten R, Gregory V, Gust I, Hampson A, Hay A, Hurt A, Smith D,  
561 Lapedes A, Jong J de, Bestebroer T, Rimmelzwaan G, Osterhaus A, Fouchier R, Holmes E,  
562 Ghedin E, Miller N, Taylor J, Bao Y, George KS, Grenfell B, Salzberg S, Fraser C, Lipman D,  
563 Young J, Palese P, Benson D, Karsch-Mizrachi A, Lipman D, Ostell J, Wheeler D, Larkin M,  
564 Blackshields G, Brown N, Chenna R, McGettigan P, McWilliam H, Valentin F, Wallace I, Wilm

- 565 A, Lopez R, Waterhouse A, Procter J, Martin D, Clamp M, Barton G, Paradis E, Claude J,  
566 Strimmer K, Handley L, Manica A, Goudet J, Balloux F, Serre D, Paabo S, Corander J,  
567 Marttinen P, Siren J, Tang J, Francois O, Ancelet S, Guillot G, Hunley K, Healy M, Long J,  
568 Kittles R, Weiss K, Manica A, Prugnolle F, Balloux F, Prugnolle F, Manica A, Balloux F,  
569 Romero I, Manica A, Handley L, Balloux F, Amos W, Hoffman J, Fraley C, Raftery A, Peres-  
570 Neto P, Jackson D, Somers K, Saporta G, Paradis E, Dray S, Dufour A, Schwarz G, Evanno  
571 G, Regnaut S, Goudet J, Jakobsson M, Rosenberg N, Chessel D, Dufour A, Thioulouse J,  
572 Dray S, Dufour A, Chessel D, Venables W, Ripley B, Nei M. 2010. Discriminant analysis of  
573 principal components: a new method for the analysis of genetically structured populations.  
574 *BMC Genet* 11:94.
- 575 37. Capriotti JA, Pelletier JS, Shah M, Caivano DM, Ritterband DC. 2009. Normal ocular flora in  
576 healthy eyes from a rural population in Sierra Leone. *Int Ophthalmol* 29:81–4.
- 577 38. Walker AW, Martin JC, Scott P, Parkhill J, Flint HJ, Scott KP. 2015. 16S rRNA gene-based  
578 profiling of the human infant gut microbiota is strongly influenced by sample processing and  
579 PCR primer choice. *Microbiome* 3:26.
- 580 39. Ramadhani AM, Derrick T, Macleod D, Holland MJ, Burton MJ. 2016. The Relationship  
581 between Active Trachoma and Ocular Chlamydia trachomatis Infection before and after Mass  
582 Antibiotic Treatment. *PLoS Negl Trop Dis* 10:e0005080.
- 583 40. Solomon AW, Holland MJ, Alexander NDE, Massae PA, Aguirre A, Natividad-Sancho A,  
584 Molina S, Safari S, Shao JF, Courtright P, Peeling RW, West SK, Bailey RL, Foster A, Mabey  
585 DCW. 2004. Mass treatment with single-dose azithromycin for trachoma. *N Engl J Med*  
586 351:1962–71.
- 587 41. Seidman JC, Coles CL, Silbergeld EK, Levens J, Mkocha H, Johnson LB, Muñoz B, West  
588 SK. 2014. Increased carriage of macrolide-resistant fecal *E. coli* following mass distribution of  
589 azithromycin for trachoma control. *Int J Epidemiol* 43:1105–13.
- 590 42. Brunham RC, Rekart ML. 2008. The Arrested Immunity Hypothesis and the Epidemiology of  
591 Chlamydia Control. *Sex Transm Dis* 35:53–54.
- 592



594 **Supplementary information**

595

596

| Assay                                    | Standard curve * |                |         |
|------------------------------------------|------------------|----------------|---------|
|                                          | LoD              | R <sup>2</sup> | CoV (%) |
| <i>S. aureus</i>                         | 4.0              | 0.991          | 14.4    |
| Coagulase-negative <i>Staphylococcus</i> | 1.2              | 0.994          | 14.7    |
| <i>S. pneumoniae</i>                     | 9.9              | 0.998          | 11.9    |
| <i>H. influenza</i>                      | 2.3              | 0.997          | 14.7    |
| Adenoviridae                             | 3.0              | 0.997          | 9.1     |
| <i>M. catarrhalis</i>                    | 1.0              | 0.993          | 7.8     |

597 CoV: Coefficient of variation; LoD: Limit of detection; R<sup>2</sup>: Coefficient of determination

598 \* Values calculated from 10-fold dilution series of PCR product between approximately 10<sup>5</sup> and 10<sup>1</sup> copies per target per test with 5  
599 technical replicates at each dilution point.

600

601 **Supplementary table 1:** Each PCR product for dilution into standards was prepared using TaqMan Universal II PCR mix  
602 (Life Technologies, Paisley, UK), cleaned with Qiagen MinElute PCR product kit (Qiagen, Manchester, UK) and serially  
603 diluted from 1:10<sup>6</sup> to 1:10<sup>12</sup> in ten-fold dilution steps. Each series was tested in five technical replicates with duplex ddPCR  
604 assays to determine the reproducibility of the assay. Target concentrations between one and 10 copies/μL were  
605 reproducibly detected by all six assays. The coefficient of determination for all assays was in excess of 0.99 when fitted to  
606 a linear regression model. All six assays were highly reproducible, and the mean coefficient of variance (CoV) was 12.1%  
607 (range: 7.8 – 14.7%).

608

Running header: Microbial correlates of active trachoma in the Solomon Islands

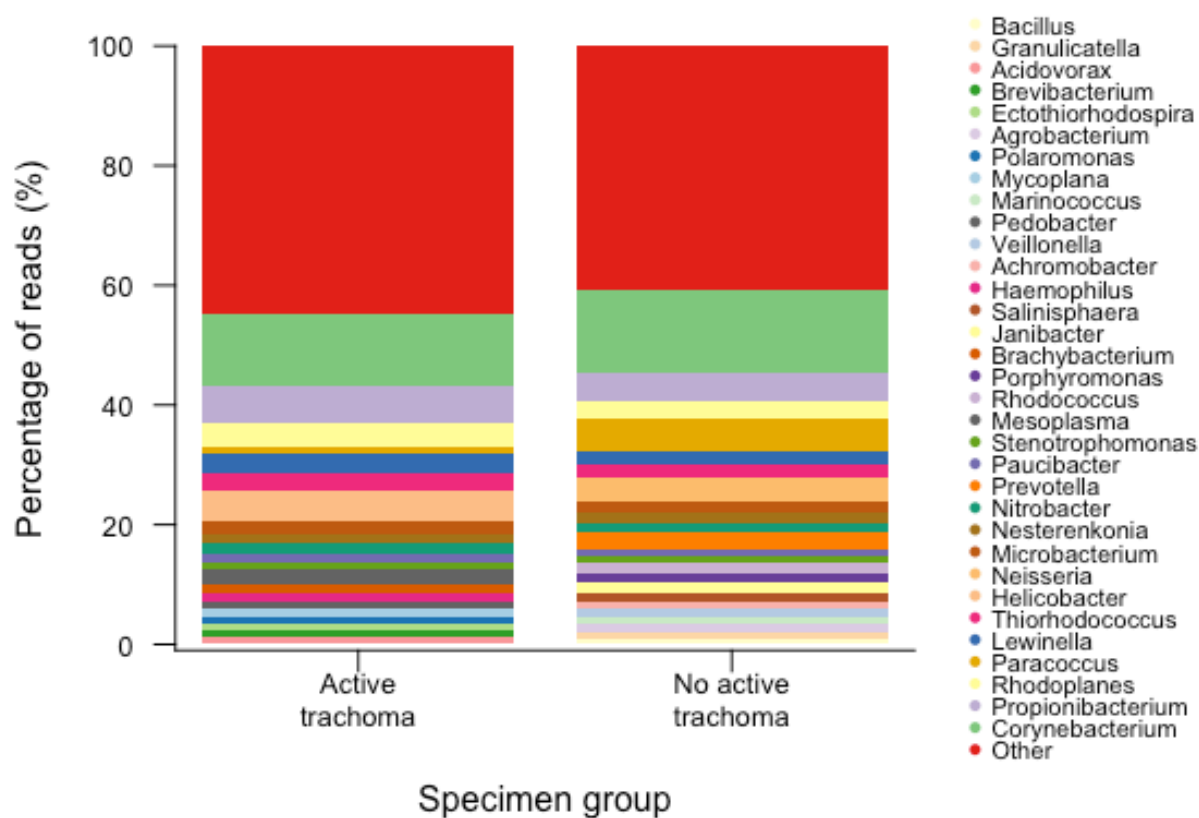

609

610

611 **Supplementary figure 2.** Relative taxa abundance in age-, sex- and location-matched children with TF/TI (n = 54) and  
612 without (n = 53). Relative taxa abundance is expressed as percentage of total reads per specimen group. Genera with  
613 reads representing less than 1% of the total number of reads were combined into a group entitled 'Other'.

614

615 **A**

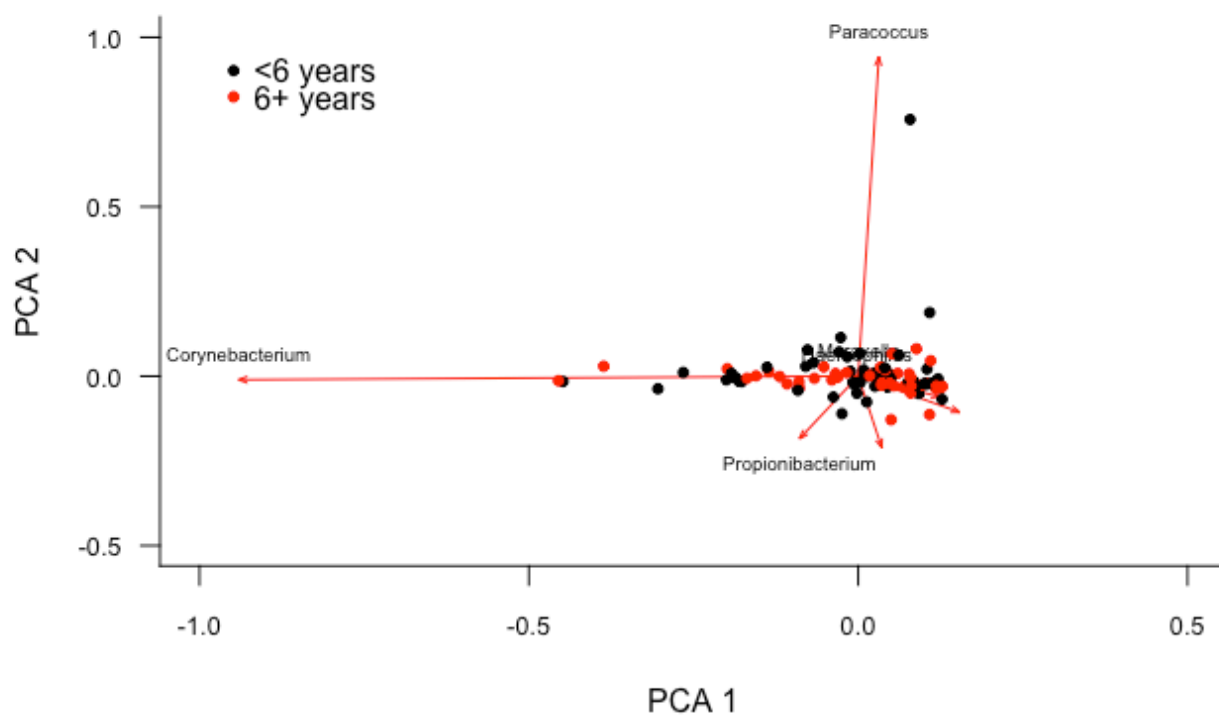

616 **B**

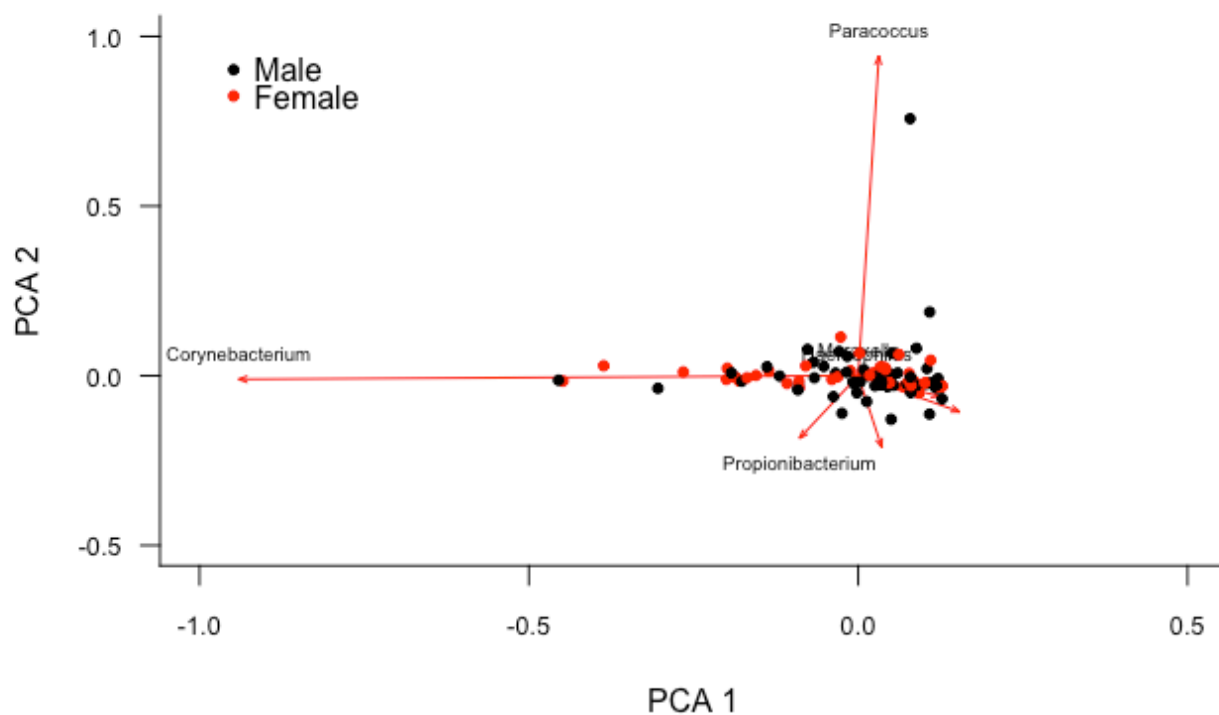

617

618 **Supplementary figure 3.** First and second principal components coloured by **(A)** age group and **(B)** gender. Red spots

619 indicate individuals. Red arrows indicate loadings.



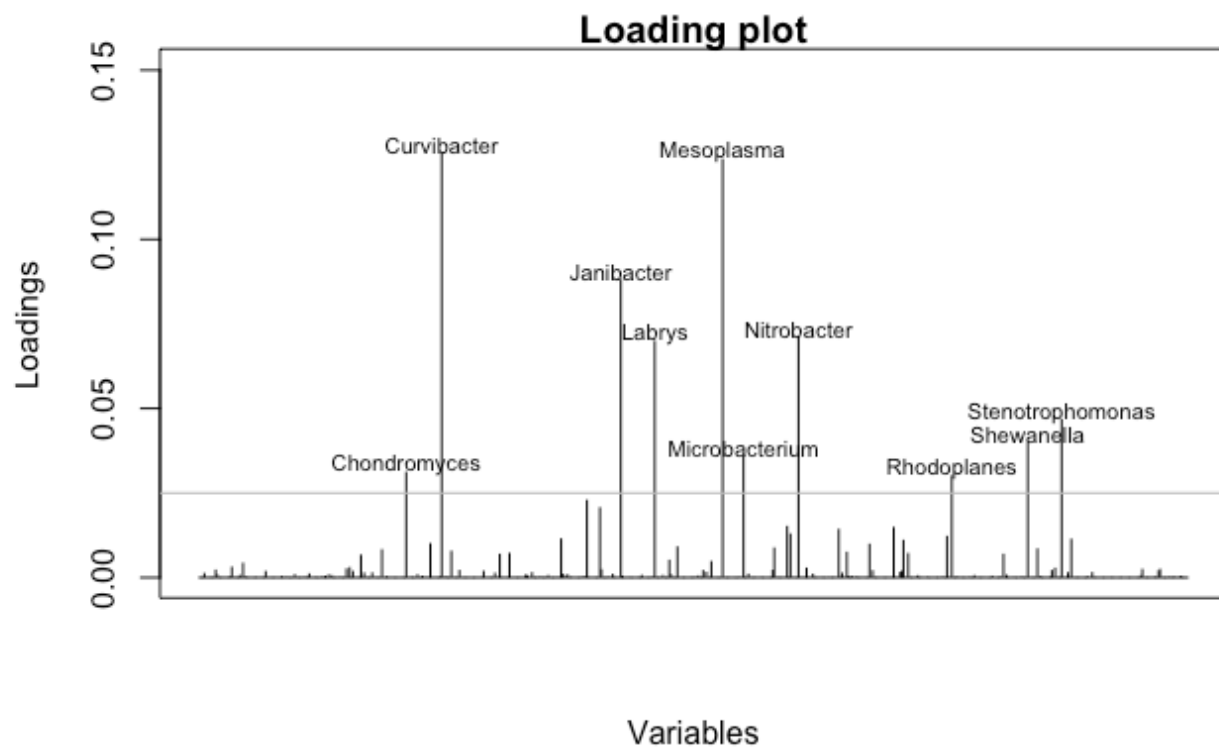

620

621 **Supplementary figure 4.** Relative contributions of genera driving difference between active trachoma cases and controls
